# Supplementary material for: Low-dose glucocorticoid treatment affects multiple aspects of intermediary metabolism in healthy humans: a randomised controlled trial
Source: PubMed Central journal article supplement — Diabetologia. 2011 May 12;54(8):2103–12. doi: 10.1007/s00125-011-2174-9 (PMC3131514; doi:10.1007/s00125-011-2174-9), 2011-05-12

## Electronic supplementary material

**ESM Fig. 1** Study design (a) and overview of the two-step hyperinsulinaemic–euglycaemic clamp protocol (b). M, start study medication; PLB, placebo; PRED, prednisolone; QD, once daily; S, screening; T1, MRI/DEXA scan; T2, clamp; V, follow-up visits

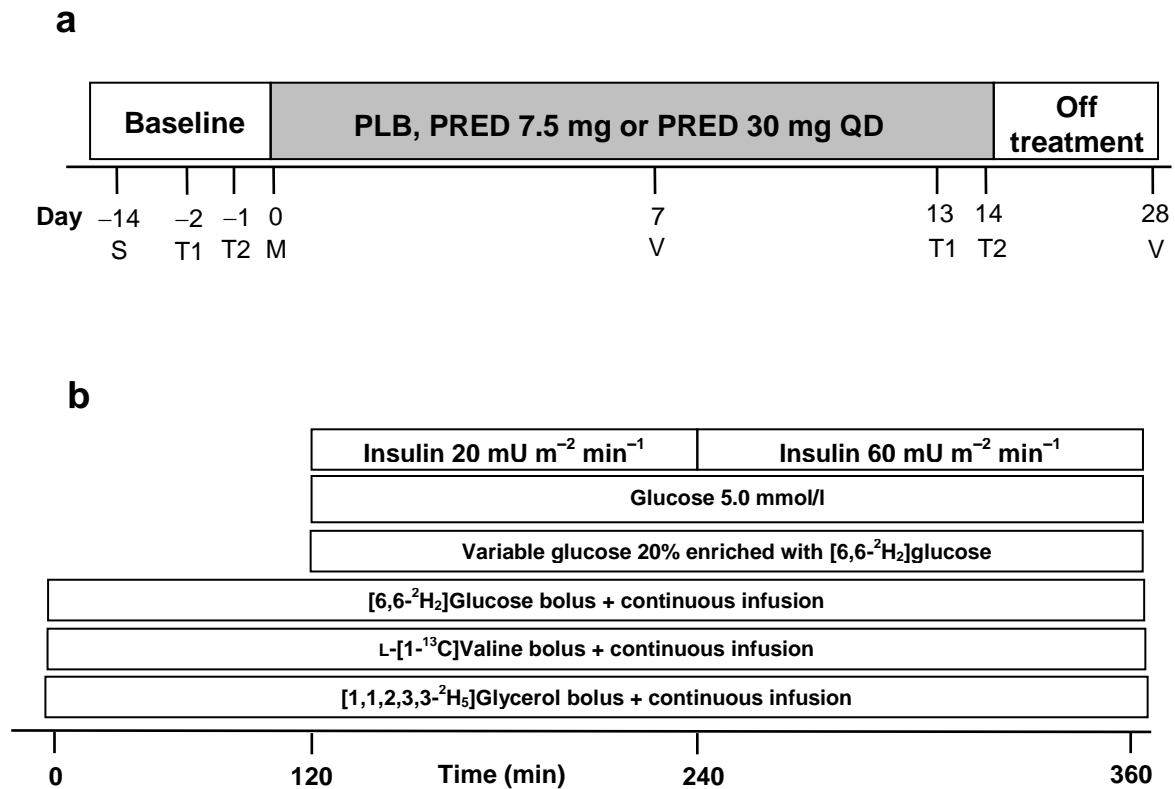

Supplement: 125_2011_2174_MOESM3_ESM.pdf [file 125_2011_2174_MOESM3_ESM.pdf]
